# Supplementary material for: Development of Carbazole Derivatives Compounds against Candida albicans: Candidates to Prevent Hyphal Formation via the Ras1-MAPK Pathway
Source: MDPI journal article supplement (doi:10.3390/jof7090688), 2021-08-25
Supplement: s1 [file s1]

**Supplementary Table S1.** Oligonucleotides used in this study.

| Primer                            | Sequence (5' - 3')                                                                                                                           | Purpose                                       |
|-----------------------------------|----------------------------------------------------------------------------------------------------------------------------------------------|-----------------------------------------------|
| UME6::HIS1<br>(F)                 | TTGTCATTTCGTTTAAACAACAACCTCATTACTGTTTAATATAA<br>AAACGAGGGATATCAATAACCTATATTCAGGAATTCATATTCTAT<br>ATCTTCACTTTTAGGCTTTCTGACTTTCTTTTATGGCAAACA  | ume6 deletion<br>(HIS1 cassette)<br>(forward) |
| UME6::HIS1<br>(R)                 | GCTATGTAAATTAACCTTGACTTGTGGAATCTTCTACGGGAA<br>AAGTTGCAAGAGTTGGTGTAATAATCAAATGGACCAAAATATTAC<br>GAGAATATTAATACGCTGCATTTTACACAACATCTTTGTTAGATA | ume6 deletion<br>(HIS1 cassette)<br>(reverse) |
| Confirm<br>UME6::HIS1<br>(F)      | ATTCAGGAATTCATATTCTATATCTTCACT                                                                                                               | ume6 deletion<br>confirm<br>(forward)         |
| Confirm<br>UME6::HIS1<br>(R)      | AACCTTGACTTGTGGAATCTT                                                                                                                        | ume6 deletion<br>confirm<br>(reverse)         |
| NRG1::HIS1<br>(F)                 | AGCTTTCTTATTATTTACAACGAGAATTAATAATCAAAAATA<br>ATCCTATTATCAGTTATTATATACTAGGATTTGTTATTACAATTTG<br>CTTTACAAGTTTAGGCTTTCTGACTTTCTTTTATGGCAAACA   | nrg1 deletion<br>(HIS1 cassette)<br>(forward) |
| NRG1::HIS1<br>(R)                 | TGTTTGAAGAGCGCTTACTACACGGGGTTGCTTAATACAAAGGC<br>GGCAGGGTTGCAGTACTTCTGTAGTTTCTAACCTTGTATTCTTA<br>GGCCCTGGATTGAACTCCCTTATGGTGCTCATGG           | nrg1 deletion<br>(HIS1 cassette)<br>(reverse) |
| Confirm<br>NRG1::HIS1<br>(F)      | GGATTGTATTACAATTTGCTTTACAAG                                                                                                                  | nrg1 deletion<br>confirm<br>(forward)         |
| Confirm<br>NRG1::HIS1<br>(R)      | TGTATTCCTTAGGCCCTGGA                                                                                                                         | nrg1 deletion<br>confirm<br>(reverse)         |
| UME6-9myc-<br>NAT1 (F)            | AAGACAAAAGAAATTAAGTGAAGTTTCATTGATTAGGAAAAGA<br>AATCAAGCTAAAACAAAAATTTCTCGGAAAAAATCAAGTAATG<br>ATATAACCAATGATtccggttctgctgtagtgg              | UME6-9myc-<br>NAT1 cassette<br>(forward)      |
| UME6-9myc-<br>NAT1 (R)            | AAATTATGAACAATTAATTAATCAATTAATAATAATAGTAATAG<br>TAATAGTAATAAAAAACAGTATAAAAAATCAATCTTCCATTTTTTT<br>TCATTTTTTCTctagtgatctacgagaccgacacc        | UME6-9myc-<br>NAT1 cassette<br>(reverse)      |
| Confirm<br>UME6-9myc-<br>NAT1 (F) | CTGAAGTTTCATTGATTAGGAAAAGAAAT                                                                                                                | UME6-9myc<br>tagging confirm<br>(forward)     |
| Confirm<br>UME6-9myc-<br>NAT1 (R) | TGTGTGCAATATATTATATAAGAACAAAACAAC                                                                                                            | UME6-9myc<br>tagging confirm<br>(reverse)     |
| NRG1-9myc-<br>NAT1 (F)            | "CAAGACTCATACCAATGGGAAAAACAAACGCAACAGACAACA<br>ACACAGGACTTTAGAAGCTTCACATGTTGGAACAAAATACAACA<br>CCAAGAGCCTAGTAtccggttctgctgtagtgg             | NRG1-9myc-<br>NAT1 cassette<br>(forward)      |
| NRG1-9myc-<br>NAT1 (R)            | TATAATACTTCTGTAGTAAATGTCGGAGTTTAAATTGCTGACAT<br>TGCAAGAAAATAAAACCAATATAATTTTTTATGTCACGAAAG<br>AAATGGAACAActagtgatctacgagaccgacacc            | NRG1-9myc-<br>NAT1 cassette<br>(reverse)      |
| Confirm<br>NRG1-9myc-<br>NAT1 (F) | CAAACGCAACAGACAACAA                                                                                                                          | NRG1-9myc<br>tagging confirm<br>(forward)     |
| Confirm<br>NRG1-9myc-<br>NAT1 (R) | TATAATACTTCTGTAGTAAATGTCGG                                                                                                                   | NRG1-9myc<br>tagging confirm<br>(reverse)     |

|         |                         |                      |
|---------|-------------------------|----------------------|
| UME6-F  | GGTGGTGTCTCTTCTGATGTT   | For quantitative PCR |
| UME6-R  | CTACCACCACCATTGTTCAAATC | For quantitative PCR |
| NRG1-F  | CAGTATGCTGCTCCTCCTTATC  | For quantitative PCR |
| NRG1-R  | GGTCTTTGCTTTGGGTGTTATT  |                      |
| RAS1-F  | GTGCTGTTAATGGTGGTGAAG   | For quantitative PCR |
| RAS1-R  | GGAAGATTTGCTTGACCAGAAG  | For quantitative PCR |
| ECE1-F  | CCAAAATTGCCTGTGCTACTG   | For quantitative PCR |
| ECE1-R  | AACAGTAGGTGCTTGGTCAG    | For quantitative PCR |
| ALS3-F  | GTGATGCTGGATCTAACGGTATT | For quantitative PCR |
| ALS3-R  | CGGTTAGGATCGAATGGTAAGG  | For quantitative PCR |
| HWP1-F  | GCCTGATGACAATCCTCCTATT  | For quantitative PCR |
| HWP1-R  | GAGTAGTAGCTGGAGTTGTTGG  | For quantitative PCR |
| HGC1-F  | ATATACACCAGGTCGCAAGC    | For quantitative PCR |
| HGC1-R  | AGAAACAGCACGAGAACCAG    | For quantitative PCR |
| CYR1-F  | CCTCCATTGGCTCAACCTATAA  | For quantitative PCR |
| CYR1-R  | GGCTGTTTCATCGTCTTCTTTC  | For quantitative PCR |
| CST20-F | CCCTGATGACGCTGCATTTA    | For quantitative PCR |
| CST20-R | GGTGTTGCTGGTGGAGTATTT   | For quantitative PCR |
| TPK1-F  | AACTTCTGGTGTGGTGATACT   | For quantitative PCR |
| TPK1-R  | TGGGTCTTCAACTCCACTTATAC | For quantitative PCR |
| STE11-F | TGGCACCTGAAGTGGTTAAG    | For quantitative PCR |
| STE11-R | AAATCTGGGAATGGATGTCTACC | For quantitative PCR |
| HST7-F  | CAGTATGGTCGGAGGATGATAAC | For quantitative PCR |
| HST7-R  | TCTGCTTCTGCTTGGACTATTT  | For quantitative PCR |
| CEK1-F  | GCAGCTACTACTTCTTCTTCCC  | For quantitative PCR |

|        |                        |                         |
|--------|------------------------|-------------------------|
| CEK1-R | TTCCATATGCTCCTTCTCCAAC | For quantitative<br>PCR |
| MKC1-F | GGCTAAACCATCAGGAGAAGAG | For quantitative<br>PCR |
| MKC1-R | CTGGTGGTCGTTACAGTAGTTG | For quantitative<br>PCR |
| ACT1-F | TGAAGCCCAATCCAAAAGAGG  | For quantitative<br>PCR |
| ACT1-R | TTCCATATCGTCCCAGTTGG   | For quantitative<br>PCR |
